# Supplementary material
Source: PubMed Central journal article supplement (PMC7906708)
Supplement: mmc1.pdf [file mmc1.pdf]

# THE LANCET

## Infectious Diseases

### Supplementary appendix

This appendix formed part of the original submission. We post it as supplied by the authors.

Supplement to: Ghafari M, KadivarA, Katzourakis A. Estimates of anti-SARS-CoV-2 antibody seroprevalence in Iran. *Lancet Infect Dis* 2021; published online Feb 15. [http://dx.doi.org/10.1016/S1473-3099\(21\)00053-0](http://dx.doi.org/10.1016/S1473-3099(21)00053-0).

**Table S1:** Comparing the percentage of exposure in 18 cities of Iran based on seroprevalence data in late April/early June<sup>1</sup> to provincial estimates for population-level exposure based on excess mortality by the end of spring (20 June 2020) and summer (21 September 2020) 1399 in solar Hijri<sup>2</sup>. (.) shows the 95% confidence intervals.

| Province           | City       | City-level exposure | Province-level exposure in spring | Province-level exposure in summer |
|--------------------|------------|---------------------|-----------------------------------|-----------------------------------|
| Khuzestan          | Ahvaz      | 9.4%(0.7-21.6)      | 16%(12-19)                        | 47%(37-57)                        |
| Ardabil            | Ardabil    | 20.0%(3.2-46.8)     | 13%(10-17)                        | 37%(28-47)                        |
| Mazandaran         | Babol*     | 22.4%(11.9-35.1)    | 21%(15-27)                        | 35%(25-45)                        |
| Esfahan (Isfahan)  | Esfahan    | 2.7%(0.0-9.8)       | 9%(6-11)                          | 21%(15-27)                        |
| Golestan           | Gorgan     | 43.9%(31.4-58.3)    | 31%(24-38)                        | 56%(44-69)                        |
| Hamedan            | Hamedan    | 8.3%(1.6-17.0)      | 6%(4-8)                           | 24%(17-31)                        |
| Kerman             | Kerman     | 8.2%(2.2-16.6)      | 3%(2-4)                           | 21%(13-26)                        |
| Kermanshah         | Kermanshah | 17.3%(5.3-30.9)     | 9%(6-11)                          | 22%(16-28)                        |
| Razavi Khorasan    | Mashhad    | 14.8%(8.2-23.1)     | 7%(5-8)                           | 29%(22-36)                        |
| Qom                | Qom        | 58.5%(37.2-83.9)    | 36%(28-44)                        | 57%(44-69)                        |
| Gilan (Guilan)     | Rasht      | 72.6%(53.9-92.8)†   | 28%(19-36)                        | 33%(22-44)                        |
| Kurdistan          | Sanandaj   | 1.7%(0.0-6.0)       | 14%(11-18)                        | 41%(31-51)                        |
| Mazandaran         | Sari*      | 14.7%(7.8-22.4)     | 21%(15-27)                        | 35%(25 - 45)                      |
| Fars               | Shiraz     | 7.3%(1.2-14.5)      | NA**                              | 14% (10 - 17)                     |
| East Azerbaijan    | Tabriz     | 5.6%(0.0-13.0)      | 9%(6-11)                          | 25% (18 - 32)                     |
| Tehran             | Tehran     | 16.3%(13.5-19.5)    | 8%(6-11)                          | 22% (16 - 28)                     |
| West Azerbaijan    | Urmia      | 10.0%(0.2-24.3)     | 6%(5-8)                           | 24% (18 - 30)                     |
| Sistan-Baluchistan | Zahedan    | 12.1%(2.3-23.3)     | NA**                              | 24% (20 - 27)                     |
| Overall            | Overall    | 17.0%(14.6-19.5)    | 10%(2-17)                         | 27% (20 - 34)                     |

\*Babol and Sari are both located in Mazandaran province.

\*\*No excess mortality was recorded in this province during spring.

†The authors note that their estimated prevalence for Rasht might be biased due to reasons outlined in the discussion<sup>2</sup>. A more recent seroprevalence study in Rasht suggests the level of exposure in this city was 23.7% (18.6-29.6) by the end of April<sup>3</sup>.

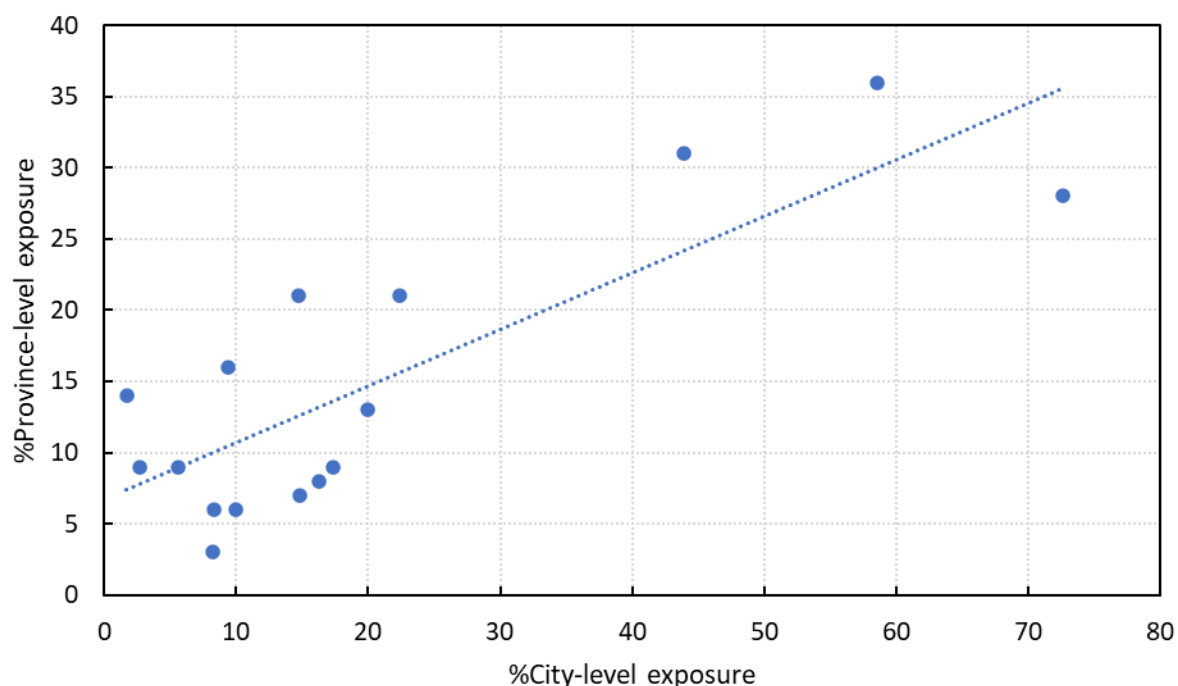

**Figure S1:** A regression analysis based on the percentage of city-level seroprevalence estimates in late April/early June and percentage of provincial-level estimates by the end of spring (20 June 2020) according to seasonal excess mortality data. The line of best fit (dashed line) corresponds to  $R^2 = 0.67$ . This analysis excludes Fars and Sistan-Baluchistan provinces which did not show significant levels of excess mortality in spring [3]. If we include those two provinces with an assumed zero excess deaths in spring (and include the two cities, Shiraz and Zahedan, with their corresponding seroprevalence estimates), then the correlation drops to  $R^2 = 0.63$ . Also, if we remove the 72.6% exposure in Rasht based on seroprevalence as an outlier data, the correlation increases to  $R^2 = 0.71$  (and  $R^2 = 0.66$  if we assume the two provinces have zero excess deaths). In all these instances, the p-value is very significant ( $p < .001$ ).

## References

1. Poustchi H, Darvishian M, Mohammadi Z, et al. SARS-CoV-2 antibody seroprevalence in the general population and high-risk occupational groups across 18 cities in Iran: a population based cross-sectional study. *Lancet Infect Dis* 2020; published online Dec 15. [https://doi.org/10.1016/S1473-3099\(20\)30858-6](https://doi.org/10.1016/S1473-3099(20)30858-6).
2. Ghafari M, Kadivar A, Katzourakis A. Excess deaths associated with the Iranian COVID-19 epidemic: a province-level analysis. *medRxiv* 2020; published online Dec 8. <https://doi.org/10.1101/2020.12.07.20245621> (preprint).
3. Shakiba M, Nazemipour M, Salari A, et al. Seroprevalence of SARS-CoV-2 in Guilan province, Iran, April 2020. *Emerg Infect Dis* 2020; published online Dec 21. <https://doi.org/10.3201/eid2702.201960>.
